# Supplementary material
Source: PubMed Central journal article supplement (PMC6776694)
Supplement: NIHMS1527798-supplement-Supplemental_Data_File___doc___tif__pdf__etc___1.pdf [file NIHMS1527798-supplement-Supplemental_Data_File___doc___tif__pdf__etc___1.pdf]

# EARLY EXTUBATION OF A PEDIATRIC POST-OP PATIENT CPG A PHN COLLABORATIVE PROJECT

Patient Sticker

**This is a project source document and must not be filed in the medical record.  
Do not discard**

**Early Extubation Anesthetic Approach**  
 Low to moderate dose opioid (Fentanyl or other opioid < 10 mcg/kg/hr with induction no more than 10 mcg/kg or alternatively, use of Remifentanyl)  
 Use of sevoflurane, isoflurane, desflurane

Coordinator Contact Information

**ICU System Readiness**  
 Anesthesiologist checked with ICU regarding ability to receive potential early extubation patient  
 Staffing Data  
 ICU census on day of surgery  
 Number of ICU nurses scheduled on day of surgery  
 Time a 2<sup>nd</sup> nurse assisted with ICU admission, either direct care or documentation time  
 Need for a 3<sup>rd</sup> nurse to assist with admission (yes/no)

**Close Monitoring**  
 Vital signs  
 Documentation of the following at least every hour:  
 Heart rate  
 Respiratory rate  
 Blood pressure  
 Temperature  
 Pain assessment for intubated patients OR Pain score using FLACC for extubated patients  
 Respiratory Support  
 Documentation of one or more of the following at least twice within 6 hours after arrival to ICU:  
 Blood gas  
 Pulse oximetry  
 ETCO<sub>2</sub>  
 Ventilator settings  
 Oxygen  
 Medication  
 Documentation of use

**Early Extubation Readiness**  
 Stable HR and blood pressures measured by:  
 use of vasoactive drugs  
 absence of arrhythmias requiring therapy  
 absence of significant active bleeding  
 Spontaneous respiratory rate  
 Acceptable blood gases (for subjects extubated after hand-off in ICU)  
 pH >7.30  
 PaCO<sub>2</sub> < 55 mmHg  
 SaO<sub>2</sub> > 90%  
 Base between -8 and +8 meq/L  
 Lactic acid < 5 mmol/L

**Anesthesia to Complete**

|                                                  |                          |                |
|--------------------------------------------------|--------------------------|----------------|
| Staffing assessed to support early extubation    | Time _____ (24 hr clock) | Initials _____ |
| Documentation of a pre-op early extubation plan  | Time _____ (24 hr clock) | Initials _____ |
| Documentation of a post-op early extubation plan | Time _____ (24 hr clock) | Initials _____ |
| Time patient admitted to ICU bed space           | Time _____ (24 hr clock) | Initials _____ |
| Hand-off complete to ICU attending               | Time _____ (24 hr clock) | Initials _____ |

**Nursing to Complete**

ICU Nurse and RRT informed of extubation plan    \_\_\_ Yes    \_\_\_ No    Initials \_\_\_\_\_

How long was a second nurse at the bedside to assist with the admission including documentation and/or direct patient care? (Please check one below and initial)

\_\_\_ None    \_\_\_ < 30 min    \_\_\_ 30-60 min    \_\_\_ > 60 min    Initials \_\_\_\_\_

Was a third nurse required at the bedside during the initial admission to assist with documentation and/or patient care?

\_\_\_ Yes    \_\_\_ No    Initials \_\_\_\_\_

# Early Extubation of a Pediatric Cardiac Post-Op Patient CPG

## Coarctation of the Aorta

### A PHN Collaborative Project

#### INCLUSION CRITERIA

- PATIENT AGE < 12 MONTHS
- DIAGNOSIS OF ISOLATED COARCTATION OF THE AORTA
- PLANNED COMPLETE SURGICAL REPAIR

#### EXCLUSION CRITERIA

- CORRECTED GESTATIONAL AGE AT TIME OF SURGERY OF <36 WEEKS
- KNOWN PRIMARY LUNG DISEASE OR AIRWAY ANOMALIES
- PATIENT RECEIVING MECHANICAL VENTILATION IMMEDIATELY PRIOR TO SURGERY (RELATIVE CONTRAINDICATION).
- KNOWN CONGENITAL OR ACQUIRED NEUROLOGICAL INJURY
- PATIENTS WITH A KNOWN CHROMOSOMAL ABNORMALITY OR SYNDROME LIKELY TO IMPACT AIRWAY OR LUNG FUNCTION
- NEONATAL PULMONARY HYPERTENSION
- PLANNED CONCOMITANT SURGICAL PROCEDURES REQUIRING CARDIOPULMONARY BYPASS

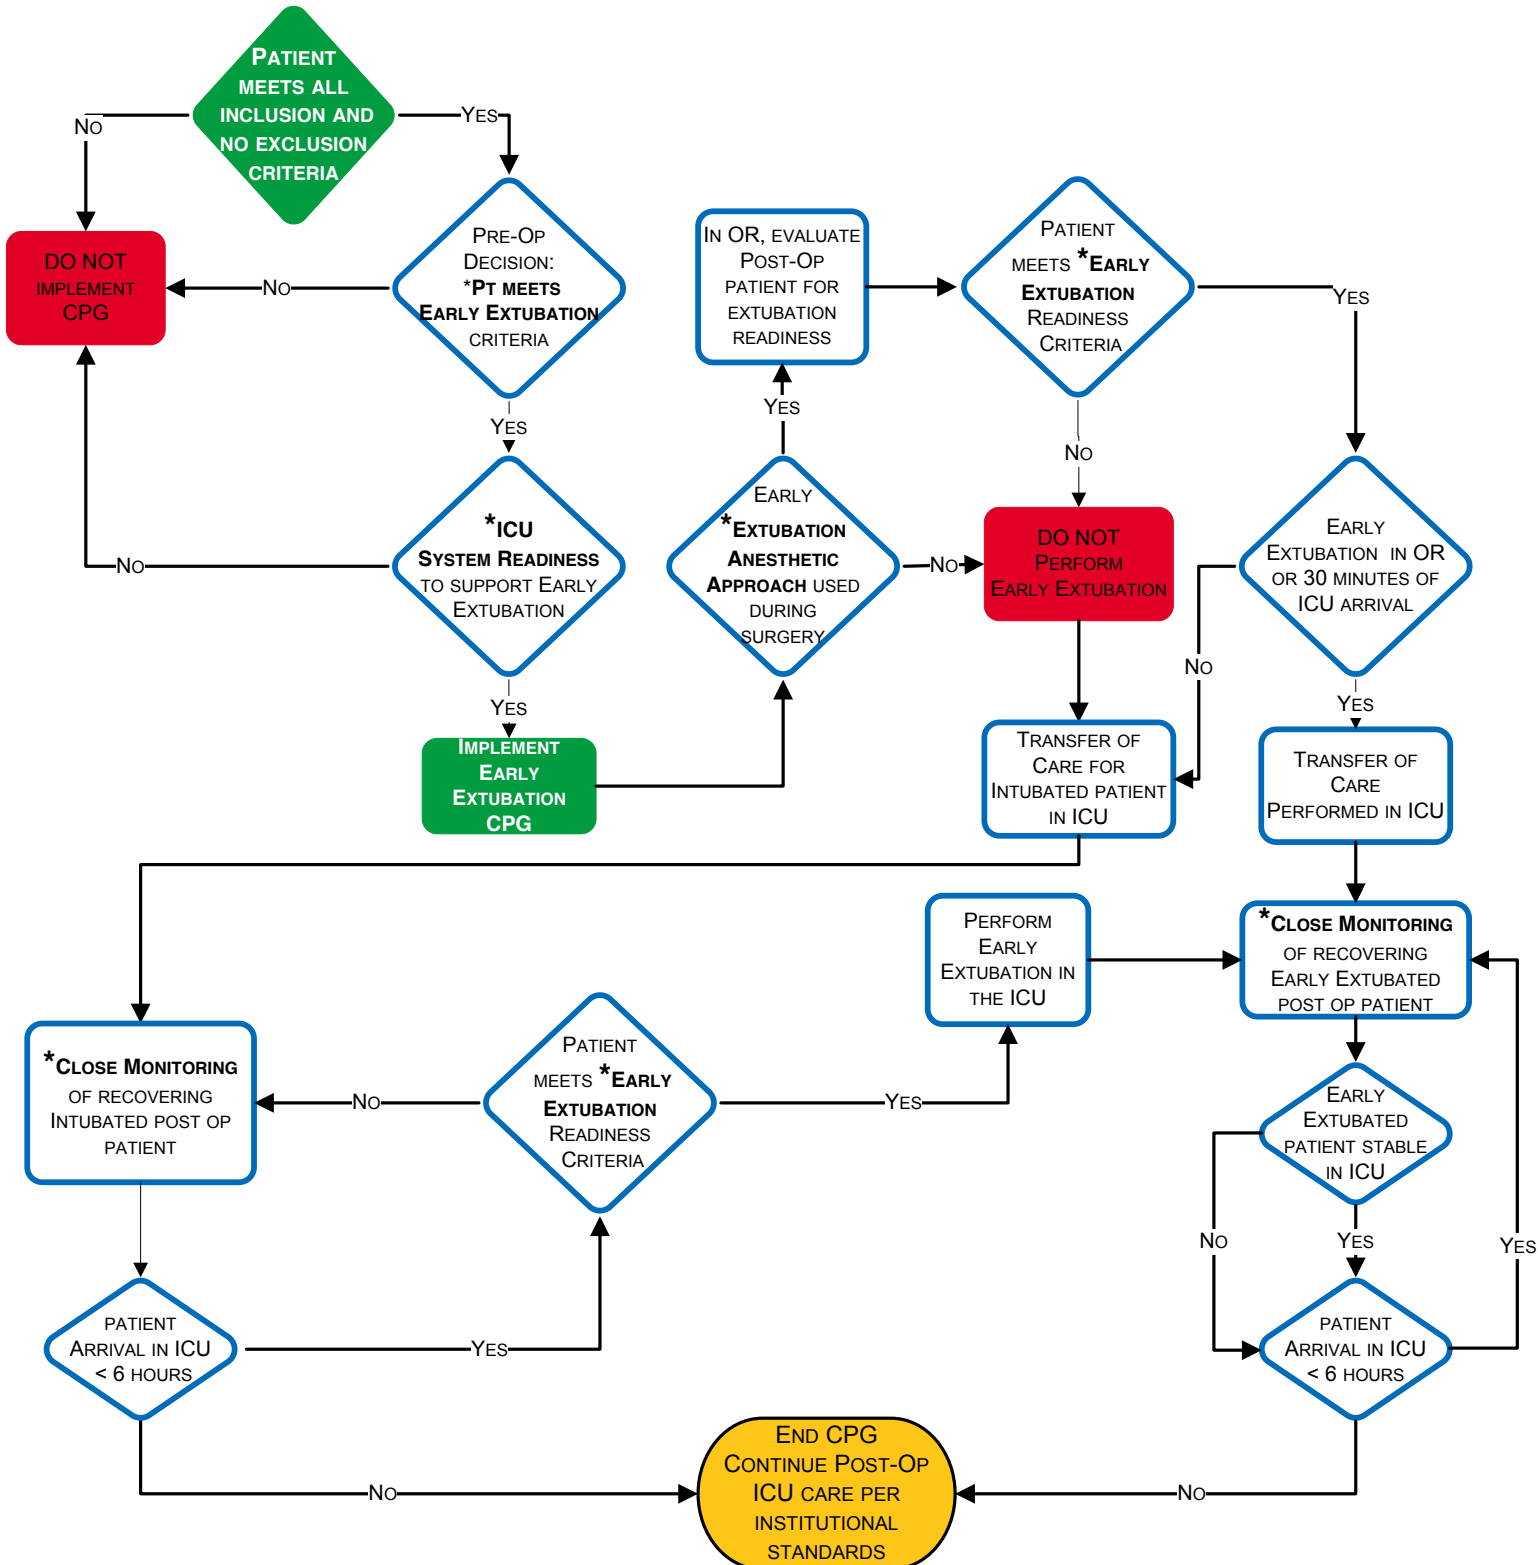

# EARLY EXTUBATION OF A PEDIATRIC POST-OP PATIENT CPG A PHN COLLABORATIVE PROJECT

Patient Sticker

**This is a project source document and must not be filed in the medical record.  
Do not discard**

### Early Extubation Anesthetic Approach

Low to moderate dose opioid (Fentanyl or other opioid < 10 mcg/kg/hr with induction no more than 10 mcg/kg or alternatively, use of Remifentanyl)  
Use of sevoflurane, isoflurane

### ICU System Readiness

Anesthesiologist checked with ICU regarding ability to receive potential early extubation patient

#### Staffing Data

ICU census on day of surgery  
Number of ICU nurses scheduled on day of surgery  
Time a 2<sup>nd</sup> nurse assisted with ICU admission, either direct care or documentation time  
Need for a 3<sup>rd</sup> nurse to assist with admission (yes/no)

### Early Extubation Readiness

Stable HR and blood pressures measured by:  
use of vasoactive drugs  
absence of arrhythmias requiring therapy  
absence of significant active bleeding  
Spontaneous respiratory rate  
Acceptable blood gases (for subjects extubated after hand-off in ICU)  
pH >7.30  
PaCO<sub>2</sub> < 55 mmHg  
SaO<sub>2</sub> > 90%  
Base between -8 and +8  
Lactic acid ≤ 5 mmol/L

### Close Monitoring

#### Vital signs

Documentation of the following at least every hour:

- Heart rate
- Respiratory rate
- Blood pressure
- Temperature
- Pain assessment for intubated patients OR
- Pain score using FLACC for extubated patients

#### Respiratory Support

Documentation of one or more of the following at least twice within 6 hours after arrival to ICU:

- Blood gas
- Pulse oximetry
- ETCO<sub>2</sub>
- Ventilator settings
- Oxygen

#### Medication

Documentation of use

**Staffing assessed to support early extubation**      Time \_\_\_\_\_ (24 hr clock)      Initials \_\_\_\_\_

## Anesthesia to Complete

**ICU Nurse and RRT informed of extubation plan**      Time \_\_\_\_\_ (24 hr clock)      Initials \_\_\_\_\_

**Time patient admitted to ICU bed space**      Time \_\_\_\_\_ (24 hr clock)      Initials \_\_\_\_\_

**Hand-off complete to ICU attending**      Time \_\_\_\_\_ (24 hr clock)      Initials \_\_\_\_\_

## Nursing to Complete

**How long was a second nurse at the bedside to assist with the admission including documentation and/or direct patient care?** (Please check one below and initial)

\_\_\_ None    \_\_\_ < 30 min    \_\_\_ 30-60 min    \_\_\_ > 60 min      Initials \_\_\_\_\_

**Was a third nurse required at the bedside during the initial admission to assist with documentation and/or patient care?**

\_\_\_ Yes    \_\_\_ No      Initials \_\_\_\_\_
