# Supplementary material
Source: PubMed Central journal article supplement (PMC6776694)
Supplement: NIHMS1527798-supplement-Supplemental_Data_File___doc___tif__pdf__etc___2.pdf [file NIHMS1527798-supplement-Supplemental_Data_File___doc___tif__pdf__etc___2.pdf]

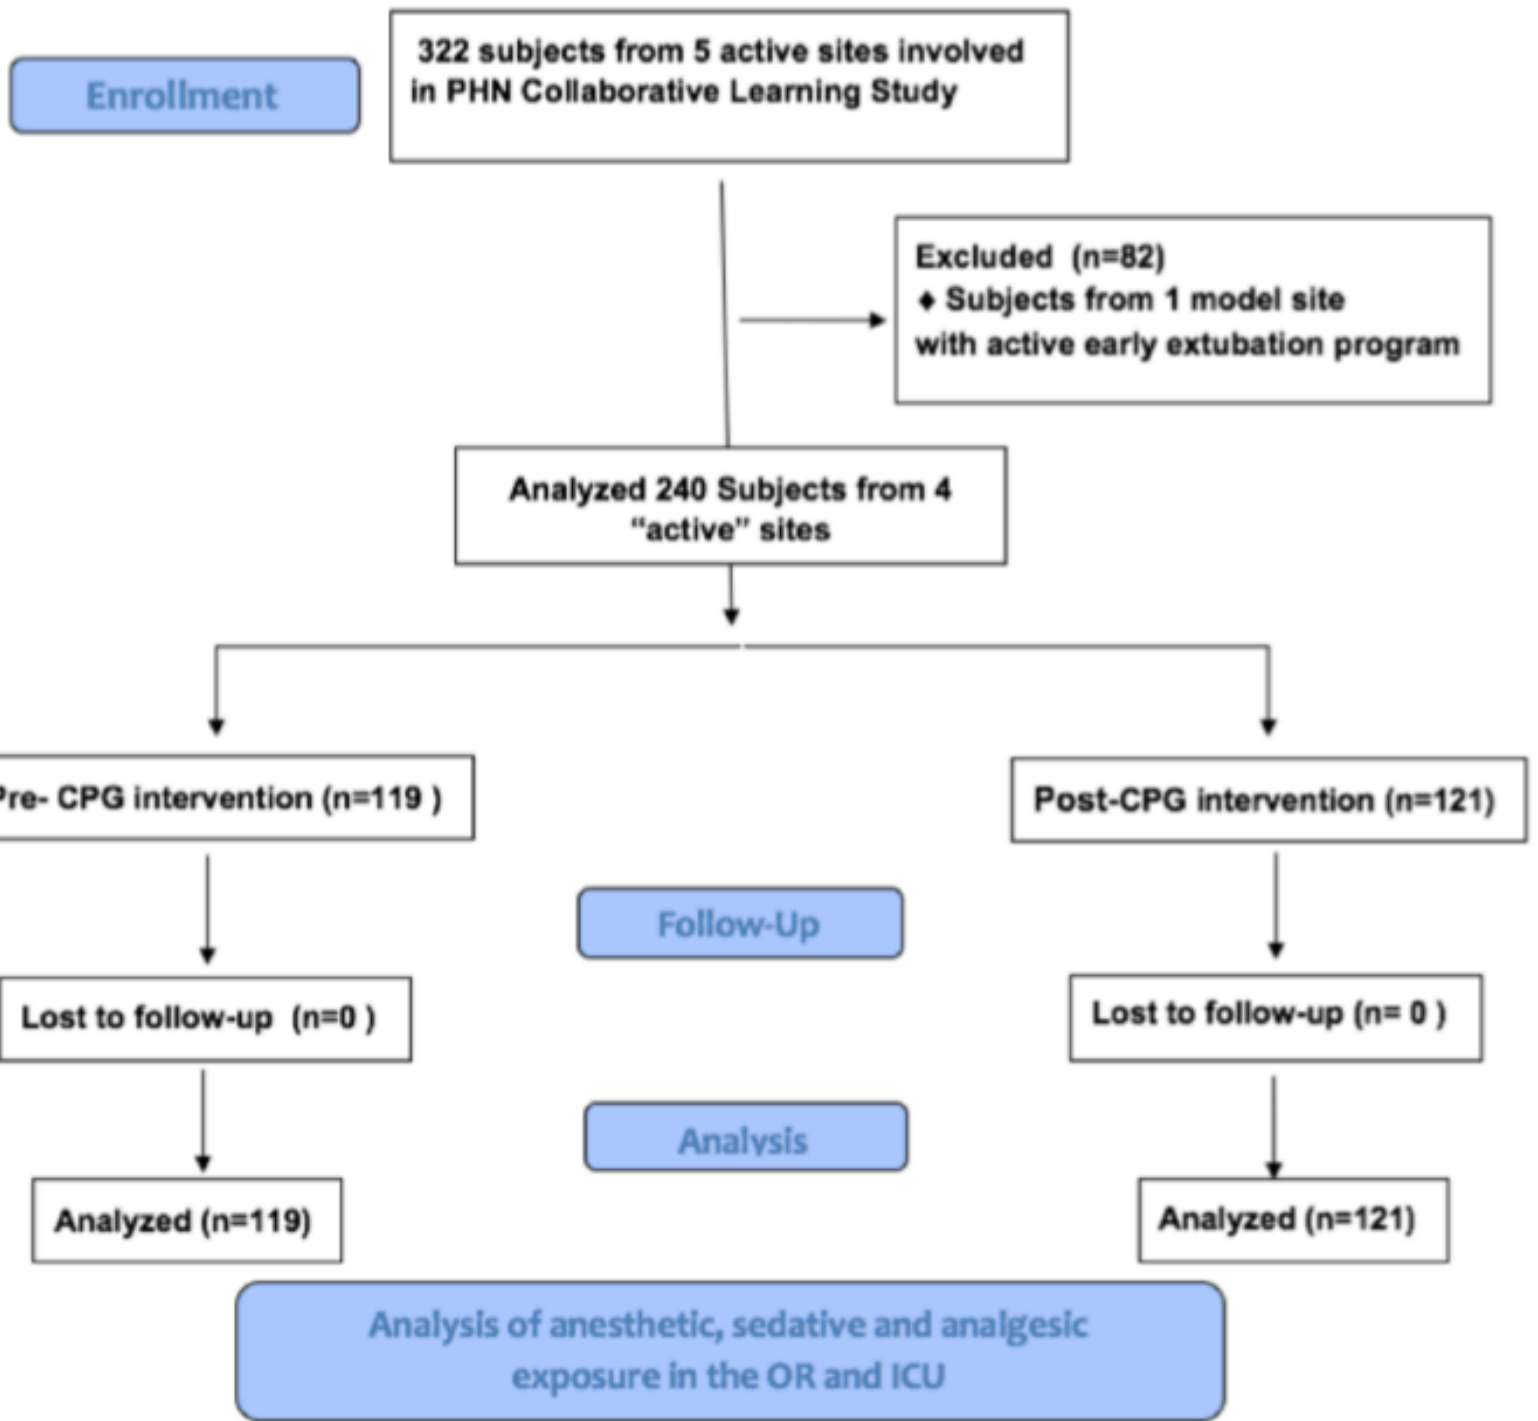

PHN- Pediatric Heart Network ; CPG-Clinical Practice Guideline

Supplementary Figure 2. Study Design
